# Supplementary material for: The Effect of Semaglutide on Blood Pressure in Patients without Diabetes: A Systematic Review and Meta-Analysis
Source: MDPI journal article supplement (doi:10.3390/jcm12030772), 2023-01-18
Supplement: s1 [file s1]

# Supplementary Material

## Search strategy

|                    |                                                                                                                                                                                                                                                                                                                                                                                                                                                                                                                                                                                                                                                                                                                                                                                                                                                                                                                                                    |
|--------------------|----------------------------------------------------------------------------------------------------------------------------------------------------------------------------------------------------------------------------------------------------------------------------------------------------------------------------------------------------------------------------------------------------------------------------------------------------------------------------------------------------------------------------------------------------------------------------------------------------------------------------------------------------------------------------------------------------------------------------------------------------------------------------------------------------------------------------------------------------------------------------------------------------------------------------------------------------|
| Publication type   | <p>RCT Medline/Embase:</p> <ol style="list-style-type: none"><li>1. 'semaglutide'/exp</li><li>2. (ozempic OR rybelsus OR semaglutide OR wegovy):ti,ab,kw</li><li>3. #1 OR #2</li><li>4. 'abnormal blood pressure'/exp OR 'blood pressure'/exp OR 'hypotension'/exp OR 'hypertension'/exp OR 'blood pressure monitoring'/exp</li><li>5. ('Blood pressure' OR hypertensi* OR hypotensi*):ti,ab,kw</li><li>6. #4 OR #5</li><li>7. 'clinical trial'/de OR 'randomized controlled trial'/de OR 'randomization'/de OR 'single blind procedure'/de OR 'double blind procedure'/de OR 'crossover procedure'/de OR 'placebo'/de OR 'prospective study'/de OR ('randomi?ed controlled' NEXT/1 trial*) OR rct OR 'randomly allocated' OR 'allocated randomly' OR 'random allocation' OR (allocated NEAR/2 random) OR (single NEXT/1 blind*) OR (double NEXT/1 blind*) OR ((treble OR triple) NEAR/1 blind*) OR placebo*</li><li>8. #3 AND #6 AND #7</li></ol> |
| Geography/Location | No restriction                                                                                                                                                                                                                                                                                                                                                                                                                                                                                                                                                                                                                                                                                                                                                                                                                                                                                                                                     |
| Publication date   | From inception of database until July 1 <sup>st</sup> 2022                                                                                                                                                                                                                                                                                                                                                                                                                                                                                                                                                                                                                                                                                                                                                                                                                                                                                         |
| Language           | No restriction                                                                                                                                                                                                                                                                                                                                                                                                                                                                                                                                                                                                                                                                                                                                                                                                                                                                                                                                     |
| Age                | No restriction                                                                                                                                                                                                                                                                                                                                                                                                                                                                                                                                                                                                                                                                                                                                                                                                                                                                                                                                     |

## Cochrane search

Date Run: 18/07/2022

(ozempic OR rybelsus OR semaglutide OR wegovy):ti,ab,kw

[mh "Blood Pressure Determination"] OR [mh "Blood Pressur"] OR [mh "Hypotension"] OR [mh "Hypertension"]

("Blood pressure" OR hypertensi\* OR hypotensi\*):ti,ab,kw

#2 OR #3

#1 AND #4

### **Medline (Ovid) search**

Date Run: 18/07/2022

Randomized controlled trials as Topic/

Randomized controlled trial/

Random allocation/

Double blind method/

Single blind method/

Clinical trial/

exp Clinical Trials as Topic/

or/1-7

(clinic\$ adj trial\$1).tw.

((singl\$ or doubl\$ or treb\$ or tripl\$) adj (blind\$3 or mask\$3)).tw.

Placebos/

Placebo\$.tw.

Randomly allocated.tw.

(allocated adj2 random).tw.

or/9-14

8 or 15

Case report.tw.

Letter/

Historical article/

Review of reported cases.pt.

Review, multicase.pt.

or/17-21

16 not 22

(ozempic OR rybelsus OR semaglutide OR wegovy).ti,ab.

Blood Pressure Determination/ OR exp Blood Pressure/ OR exp Hypotension/ OR exp Hypertension/

(Blood pressure or hypertensi\* or hypotensi\*).ti,ab.

25 OR 26

23 AND 24 AND 27

## **CINAHL**

Date Run: 18/07/2022

TI (ozempic OR rybelsus OR semaglutide OR wegovy) OR AB (ozempic OR rybelsus OR semaglutide OR wegovy)

(MH "Blood Pressure+") OR (MH "Blood Pressure Determination") OR (MH "Hypertension+") OR (MH "Hypotension+")

TI ("Blood pressure" OR hypertensi\* OR hypotensi\*) OR AB ("Blood pressure" OR hypertensi\* OR hypotensi\*)

S2 OR S3

TX allocat\* random\* OR (MH "Quantitative Studies") OR (MH "Placebos") OR TX placebo\* OR TX random\* allocat\* OR (MH "Random Assignment") OR TX randomi\* control\* trial\* OR TX ( (singl\* n1 blind\*) OR (singl\* n1 mask\*) ) OR TX ( (doubl\* n1 blind\*) OR (doubl\* n1 mask\*) ) OR TX ( (tripl\* n1 blind\*) OR (tripl\* n1 mask\*) ) OR TX ( (trebl\* n1 blind\*) OR (trebl\* n1 mask\*) ) OR TX clinic\* n1 trial\* OR PT Clinical trial OR (MH "Clinical Trials+")

S1 AND S4 AND S5

## **Web of Science**

(ozempic OR rybelsus OR semaglutide OR wegovy) AND ("blood pressure" OR hypotensi\* OR hypertensi\*) AND (randomised OR randomized OR randomisation OR randomisation OR placebo\* OR (random\* AND (allocat\* OR assign\*)) OR (blind\* AND (single OR double OR treble OR triple)))

**Google Scholar**

Ozempic|rybelsus|semaglutide|wegovy "blood pressure"|hypotension|hypertension  
randomised|randomized|randomisation|randomisation|placebo

**Figure S1:** Leave-one-out sensitivity analysis of the treatment effect on SBP.

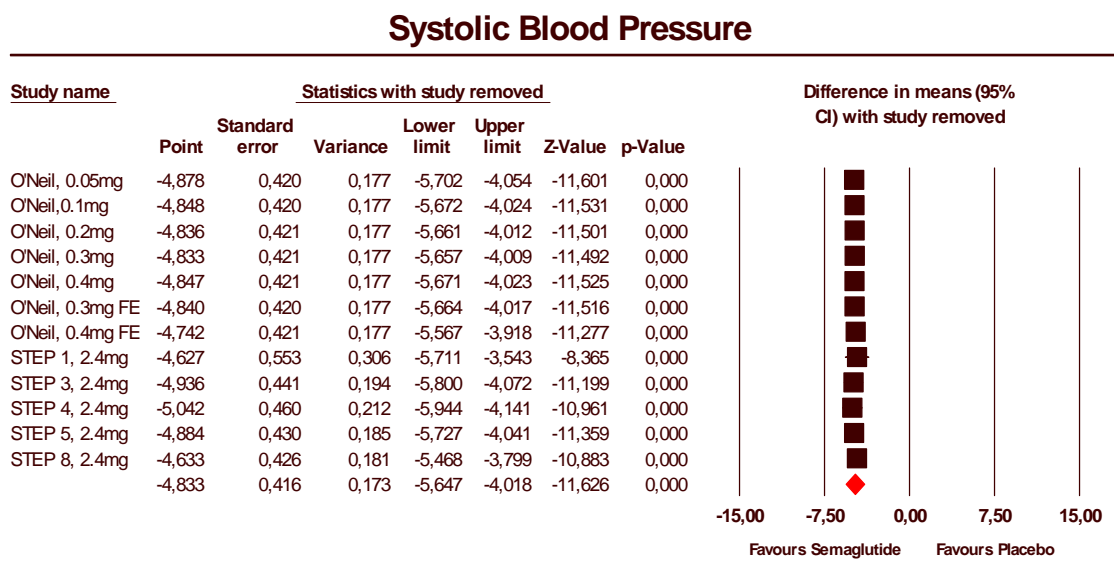

Figure S2: Leave-one-out sensitivity analysis of the treatment effect on DBP.

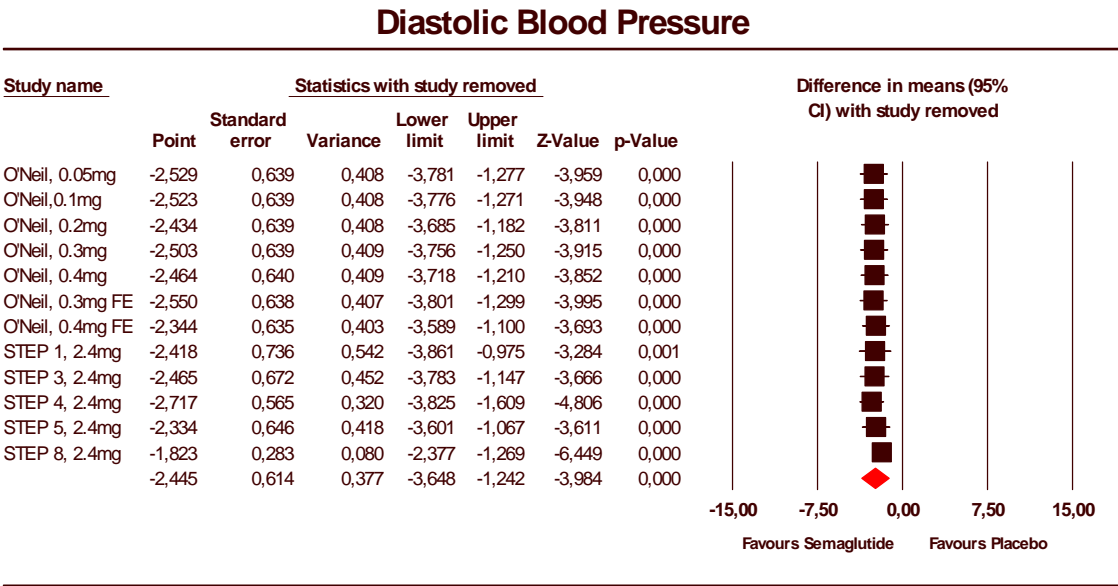

**Figure S3:** Forest plot of semaglutide vs placebo showing the pooled weighted mean difference for SBP (fixed effect model).

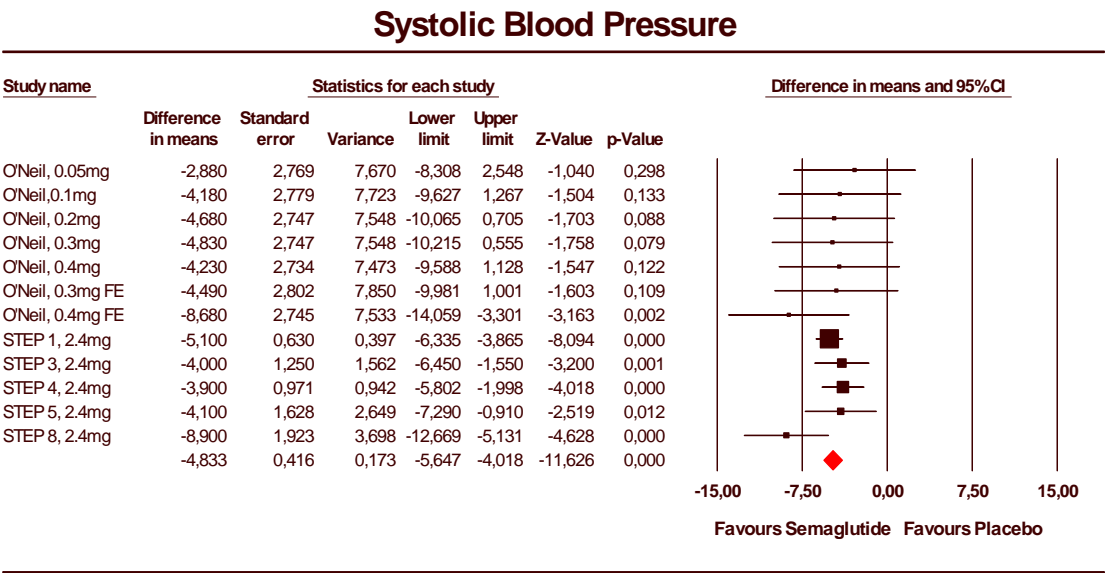

**Figure S4:** Forest plot of semaglutide vs placebo showing the pooled weighted mean difference for DBP (fixed effect model).

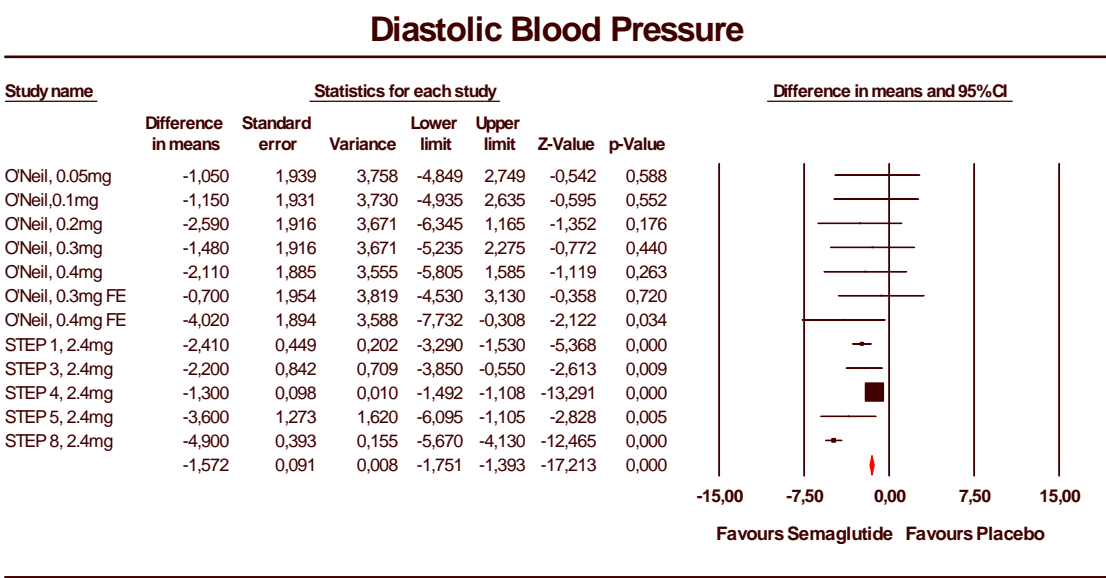



**Figure S5:** Funnel plot of the effect of semaglutide on SBP.

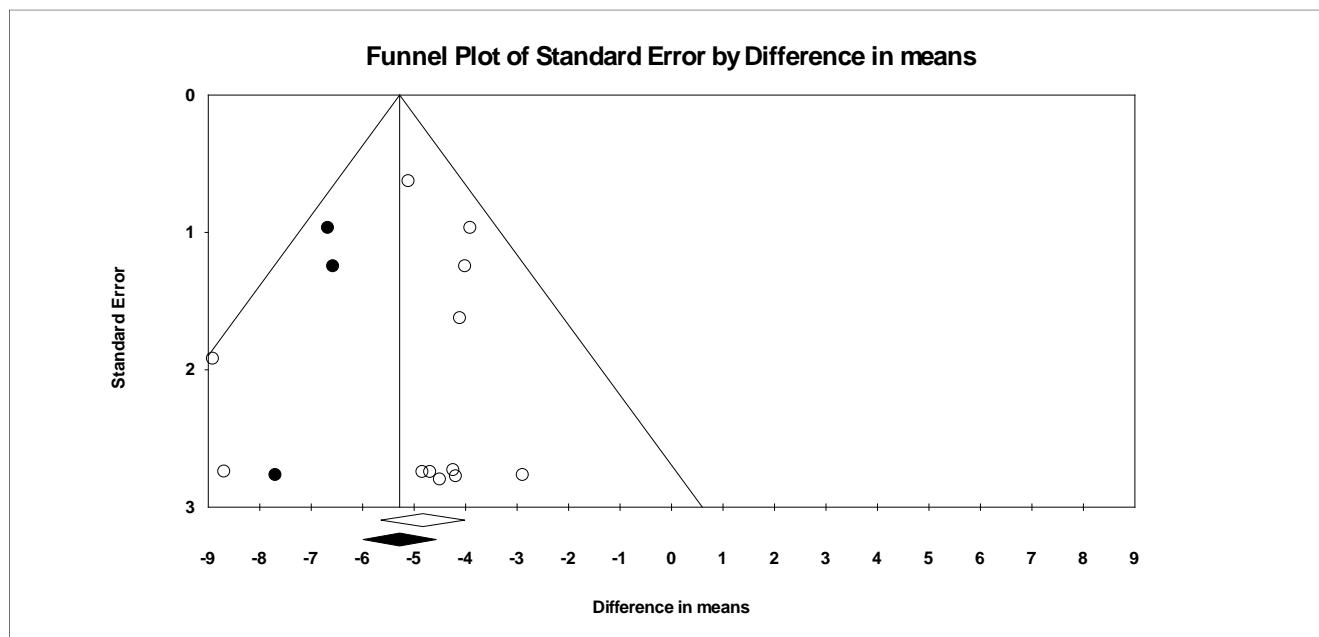

**Figure S6:** Meta-regression analysis of the duration of follow-up and effect of semaglutide on SBP (mmHg). The duration of follow-up is in weeks.

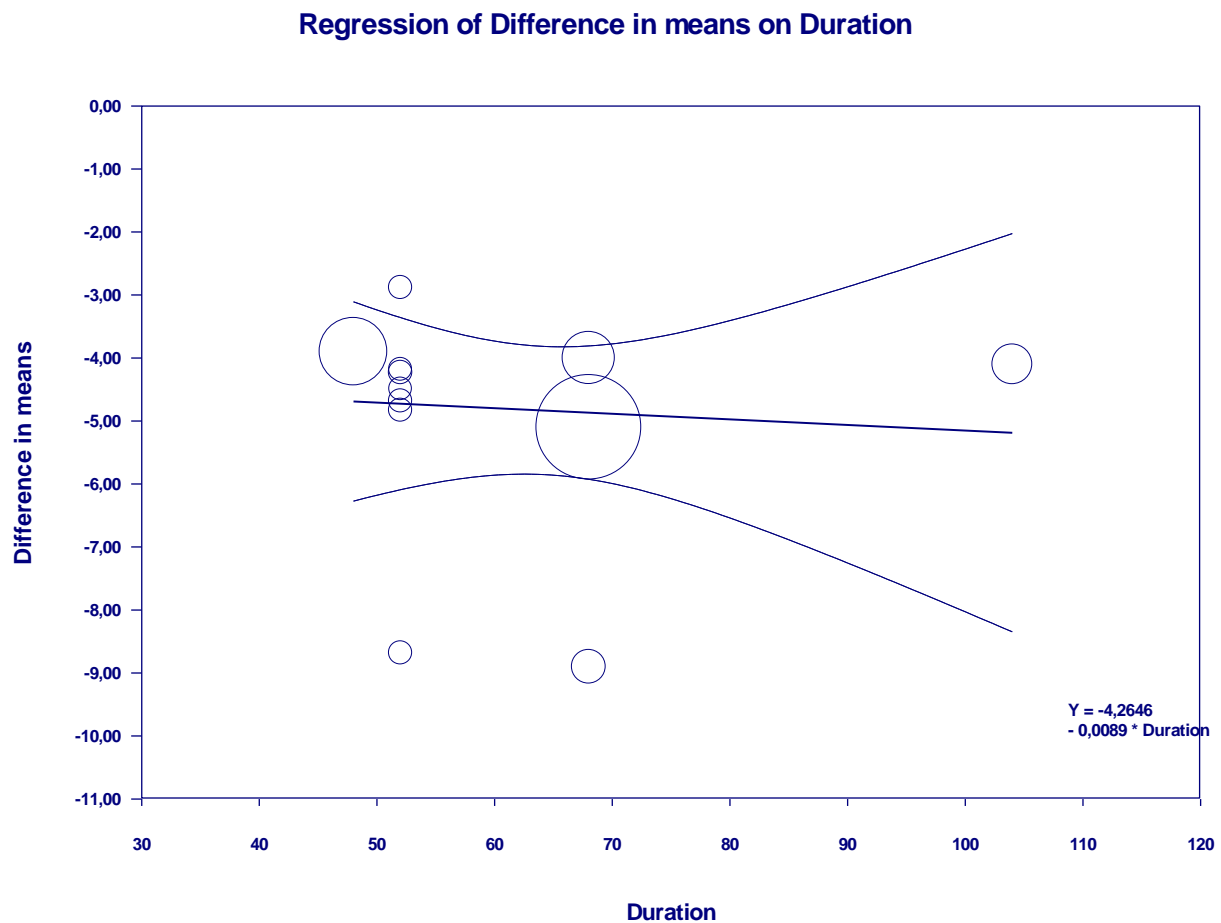

**Figure S7:** Meta-regression analysis of the semaglutide dose (mg) on SBP (mmHg).

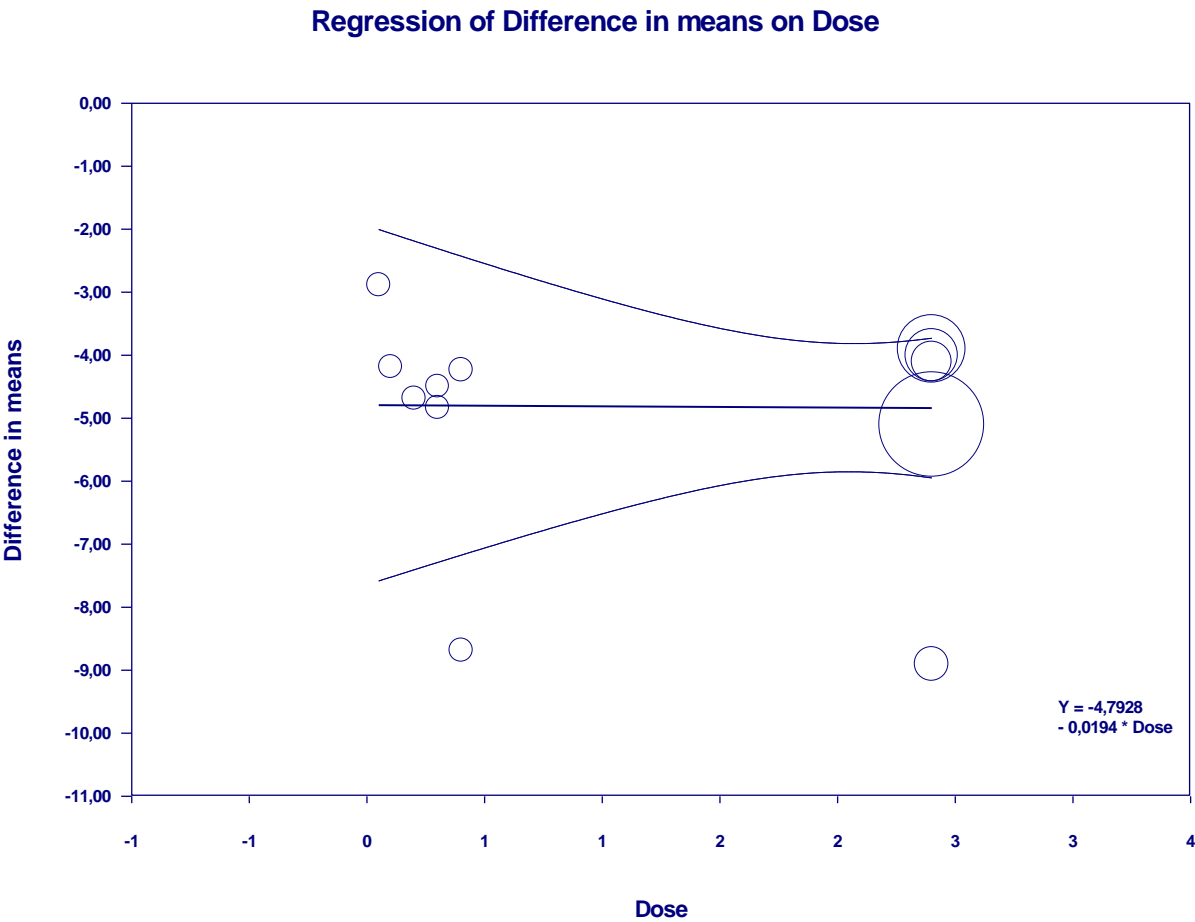

Figure S8: Risk of bias assessment of the included studies.

|              | Randomization process                                                             | Deviations from intended interventions                                            | Missing outcome data                                                              | Measurement of the outcome                                                        | Selection of the reported result                                                  | Overall Bias                                                                      |
|--------------|-----------------------------------------------------------------------------------|-----------------------------------------------------------------------------------|-----------------------------------------------------------------------------------|-----------------------------------------------------------------------------------|-----------------------------------------------------------------------------------|-----------------------------------------------------------------------------------|
| O'Neil et al |  |  |  |  |  |  |
| STEP 1       |  |  |  |  |  |  |
| STEP 3       |  |  |  |  |  |  |
| STEP 4       |  |  |  |  |  |  |
| STEP 5       |  |  |  |  |  |  |
| STEP 8       |  |  |  |  |  |  |
